# Supplementary material
Source: publisher figshare collection journal article supplement (https://karger.figshare.com/articles/dataset/_/6139211)
Supplement: Supplementary file 2 [file 1]

**Supplemental Table 1.** Reported uniparental isodisomy causing autosomal recessive diseases

| UPiD Pattern | Parental origin | ND | Chr. | Gene            | Disease                                                                    | Method | Reference                      |
|--------------|-----------------|----|------|-----------------|----------------------------------------------------------------------------|--------|--------------------------------|
| s-MiRe       | M               |    | 2    | <i>TPO</i>      | Congenital hypothyroidism                                                  | MS     | Bakker et al. 2001             |
| s-MiRe       | M               |    | 4    | <i>MTP</i>      | Abetalipoproteinemia                                                       | MS     | Yang et al. 1999               |
| s-MiRe       | M               |    | 7    | <i>ATP6V0A4</i> | Distal renal tubular acidosis                                              | SA     | This study                     |
| s-MiRe       | M               |    | 13   | <i>PCCA</i>     | Propionic acidemia                                                         | MS     | Pérez et al. 2012              |
| s-MiRe       | P               |    | 2    | <i>ABCB11</i>   | Progressive familial intrahepatic cholestasis                              | MS     | Giovannoni et al. 2012         |
| s-MiRe       | P               |    | 5    | <i>MTRR</i>     | Homocystinuria cblE type                                                   | MS     | Pérez et al. 2012              |
| s-MiRe       | P               |    | 11   | <i>HBB</i>      | Sickle cell disease                                                        | SA     | Swensen et al. 2010            |
| s-UPiD/hD    | M               | M1 | 1    | <i>LAMB3</i>    | Herlitz type junctional epidermolysis bullosa                              | MS     | Pulkkinen et al. 1997          |
| s-UPiD/hD    | M               | M1 | 1    | <i>LMNA</i>     | Mandibuloacral dysplasia                                                   | MS     | Bai et al. 2014                |
| s-UPiD/hD    | M               | M1 | 2    | <i>ALS2</i>     | Infantile-onset ascending spastic paralysis                                | MS     | Herzfeld et al. 2009           |
| s-UPiD/hD    | M               | M1 | 2    | <i>DGUOK</i>    | Hepatocerebral mitochondrial DNA depletion syndrome                        | MS+SA  | Haudry et al. 2012             |
| s-UPiD/hD    | M               | M1 | 4    | <i>FGB</i>      | Congenital hypodysfibrinogenemia                                           | MS+SA  | Ding et al. 2012               |
| s-UPiD/hD    | M               | M1 | 15   | <i>HEXA</i>     | Tay–Sachs disease                                                          | SA     | Zeesman et al. 2015            |
| s-UPiD/hD    | M               | M1 | 15   | <i>RECQL3</i>   | Bloom syndrome                                                             | MS     | Woodage et al. 1994            |
| s-UPiD/hD    | M               | M1 | 16   | <i>APRT</i>     | Adenine phosphoribosyltransferase deficiency                               | MS     | Ceballos-Picot et al. 2011     |
| s-UPiD/hD    | M               | M1 | 16   | <i>FA2H</i>     | Spastic paraplegia type 35                                                 | SA     | Soehn et al. 2016              |
| s-UPiD/hD    | M               | M1 | 16   | <i>FANCA</i>    | Fanconi anemia                                                             | SA     | Donovan et al. 2016            |
| s-UPiD/hD    | M               | M1 | 16   | <i>GALNS</i>    | Morquio A syndrome                                                         | MS     | Catarzi et al. 2012            |
| s-UPiD/hD    | M               | M1 | 16   | <i>MLYCD</i>    | Malonyl CoA decarboxylase deficiency                                       | MS     | Malvagia et al. 2007           |
| s-UPiD/hD    | M               | M1 | 17   | <i>CTNS</i>     | Infantile cystinosis                                                       | MS     | Lebre et al. 2009              |
| s-UPiD/hD    | M               | M1 | 22   | <i>CYB5R3</i>   | Recessive congenital methemoglobinemia                                     | MS     | Huang et al. 2012              |
| s-UPiD/hD    | M               | M1 | 22   | <i>PLA2G6</i>   | Infantile neuroaxonal dystrophy 1                                          | SA     | Solomons et al. 2014           |
| s-UPiD/hD    | M               | M2 | 1    | <i>GJC2</i>     | Pelizaeus–Merzbacher-like disease                                          | SA     | Shimojima et al. 2013          |
| s-UPiD/hD    | M               | M2 | 2    | <i>SFTPB</i>    | Lethal surfactant deficiency                                               | MS     | Hamvas et al. 2009             |
| s-UPiD/hD    | M               | M2 | 4    | <i>MTTP</i>     | Abetalipoproteinemia                                                       | MS     | Aminoff et al. 2012            |
| s-UPiD/hD    | M               | M2 | 4    | <i>SGCB</i>     | Limb-girdle muscular dystrophy 2E                                          | SA     | Cottrell et al. 2012           |
| s-UPiD/hD    | M               | M2 | 6    | <i>CUL7</i>     | 3M syndrome                                                                | SA     | Sasaki et al. 2011             |
| s-UPiD/hD    | M               | M2 | 9    | <i>CHH</i>      | Cartilage hair hypoplasia                                                  | MS     | Sulisalo et al. 1997           |
| s-UPiD/hD    | M               | M2 | 9    | <i>FOXE1</i>    | Syndromic congenital hypothyroidism                                        | MS     | Castanet et al. 2010           |
| s-UPiD/hD    | M               | M2 | 16   | <i>FANCC</i>    | Fanconi anemia                                                             | SA     | Donovan et al. 2016            |
| s-UPiD/hD    | P               | M1 | 1    | <i>ABCA4</i>    | Stargardt disease                                                          | MS     | Riveiro-Alvarez et al. 2007    |
| s-UPiD/hD    | P               | M1 | 1    | <i>P131R</i>    | Fumarase deficiency                                                        | MS     | Zeng et al. 2006               |
| s-UPiD/hD    | P               | M1 | 1    | <i>USH2A</i>    | Usher syndrome type II                                                     | MS     | Rivolta et al. 2002            |
| s-UPiD/hD    | P               | M2 | 1    | <i>CTSK</i>     | Pycnodysostosis                                                            | MS     | Gelb et al. 1998               |
| w-UPiD       | M               |    | 1    | <i>CD45</i>     | Severe combined immunodeficiency                                           | SA     | Roberts et al. 2012            |
| w-UPiD       | M               |    | 1    | <i>LAMB3</i>    | Herlitz junctional epidermolysis bullosa                                   | MS     | Castori et al. 2008            |
| w-UPiD       | M               |    | 1    | <i>LYST</i>     | Chediak–Higashi syndrome                                                   | MS     | Dufourcq-Lagelouse et al. 1999 |
| w-UPiD       | M               |    | 1    | <i>PEX</i>      | Zellweger syndrome                                                         | MS     | Turner et al. 2007             |
| w-UPiD       | M               |    | 3    | <i>COL7A1</i>   | Recessive dystrophic epidermolysis bullosa                                 | MS     | Fassihi et al. 2006            |
| w-UPiD       | M               |    | 6    | <i>TULP1</i>    | Cone dystrophy                                                             | MS     | Roosing et al. 2013            |
| w-UPiD       | M               |    | 6    | <i>CYP21A2</i>  | Congenital adrenal hyperplasia                                             | MS     | Spiro et al. 1999              |
| w-UPiD       | M               |    | 7    | <i>CFTR</i>     | Cystic fibrosis                                                            | MS     | Spence et al. 1988             |
| w-UPiD       | M               |    | 7    | <i>CLCN1</i>    | Recessive congenital myotonia                                              | MS     | Bulli et al. 2009              |
| w-UPiD       | M               |    | 8    | <i>TMEM67</i>   | Meckel–Gruber syndrome                                                     | SA     | Bruechle et al. 2017           |
| w-UPiD       | M               |    | 9    | <i>CHH</i>      | Cartilage hair hypoplasia                                                  | MS     | Sulisalo et al. 1997           |
| w-UPiD       | M               |    | 10   | <i>HPS1</i>     | Hermansky–Pudlak syndrome type 1                                           | SA     | Li et al. 2016                 |
| w-UPiD       | M               |    | 12   | <i>VDR</i>      | Hereditary 1,25-dihydroxyvitamin D-resistant rickets                       | SA     | Tamura et al. 2015             |
| w-UPiD       | M               |    | 12   | <i>VWF</i>      | Von Willebrand disease type 3                                              | MS     | Boisseau et al. 2011           |
| w-UPiD       | M               |    | X    | <i>DMD</i>      | Duchenne muscular dystrophy                                                | MS     | Quan et al. 1997               |
| w-UPiD       | P               |    | 1    | <i>ALPL</i>     | Perinatal hypophosphatasia                                                 | SA     | Watanabe et al. 2013           |
| w-UPiD       | P               |    | 1    | <i>CFH</i>      | Complement factor H deficiency                                             | MS     | Schejbel et al. 2011           |
| w-UPiD       | P               |    | 1    | <i>GBA, MPZ</i> | Concurrently Gaucher disease Type 3 and Charcot–Marie–Tooth disease type I | MS     | Benko et al. 2008              |
| w-UPiD       | P               |    | 1    | <i>GNPAT</i>    | Rhizomelic chondrodysplasia punctata Type 2                                | MS     | Nimmo et al. 2010              |
| w-UPiD       | P               |    | 1    | <i>HMGCL</i>    | 3-hydroxy-3-methylglutaryl-CoA lyase deficiency                            | SA     | Aoyama et al. 2015             |
| w-UPiD       | P               |    | 1    | <i>LAMB3</i>    | Herlitz junctional epidermolysis bullosa                                   | MS     | Fassihi et al. 2005            |
| w-UPiD       | P               |    | 1    | <i>PPT1</i>     | Infantile neuronal ceroid lipofuscinosis                                   | SA     | Niida et al. 2016              |
| w-UPiD       | P               |    | 1    | <i>PPT1</i>     | Neuronal ceroid lipofuscinosis type 1                                      | SA     | Travaglini et al. 2017         |
| w-UPiD       | P               |    | 1    | <i>PRG4</i>     | CACP syndrome                                                              | MS     | Ciullini Mannurita et al. 2014 |
| w-UPiD       | P               |    | 1    | <i>RPE65</i>    | Retinal dystrophy                                                          | MS     | Thompson et al. 2002           |
| w-UPiD       | P               |    | 1    | <i>TRKA</i>     | Congenital insensitivity to pain with anhidrosis                           | MS     | Miura et al. 2000              |
| w-UPiD       | P               |    | 2    | <i>ABCA12</i>   | Harlequin ichthyosis                                                       | MS     | Castiglia et al. 2009          |
| w-UPiD       | P               |    | 2    | <i>CYP11B1</i>  | Primary congenital glaucoma                                                | MS     | López-Garrido et al. 2009      |

|        |   |    |                |                                                                                        |     |                         |
|--------|---|----|----------------|----------------------------------------------------------------------------------------|-----|-------------------------|
| w-UPiD | P | 2  | <i>DGUOK</i>   | Mitochondrial DNA depletion syndrome                                                   | SA  | Douglas et al. 2011     |
| w-UPiD | P | 2  | <i>GGCX</i>    | Inherited deficiency of all vitamin K-dependent coagulant factors                      | NGS | Dasi et al. 2016        |
| w-UPiD | P | 2  | <i>HADHA</i>   | Long chain 3-hydroxyacyl-CoA dehydrogenase deficiency                                  | MS  | Baskin et al. 2010      |
| w-UPiD | P | 2  | <i>LRP2</i>    | Donnai-Barrow syndrome                                                                 | MS  | Kantarci et al. 2008    |
| w-UPiD | P | 2  | <i>MERTK</i>   | Retinal dystrophy                                                                      | MS  | Thompson et al. 2002    |
| w-UPiD | P | 2  | <i>NEB</i>     | Nemalin myopathy                                                                       | SA  | This study              |
| w-UPiD | P | 2  | <i>UGT1A1</i>  | Crigler-Najjar syndrome type I                                                         | MS  | Petit et al. 2005       |
| w-UPiD | P | 3  | <i>LAMB2</i>   | Pierson syndrome                                                                       | MS  | Matejas et al. 2011     |
| w-UPiD | P | 5  | <i>SMN1</i>    | Spinal muscular atrophy                                                                | MS  | Brzustowicz et al. 1994 |
| w-UPiD | P | 6  | <i>IFNGR1</i>  | Mendelian susceptibility to mycobacterial disease                                      | SA  | Prando et al. 2010      |
| w-UPiD | P | 6  | <i>MUT</i>     | Methylmalonic acidemia and agenesis of pancreatic beta cells causing diabetes mellitus | MS  | Abramowicz et al. 1994  |
| w-UPiD | P | 7  | <i>CFTR</i>    | Cystic fibrosis                                                                        | MS  | Le Caignec et al. 2007  |
| w-UPiD | P | 7  | <i>DNAH11</i>  | Primary ciliary dyskinesia                                                             | MS  | Bartoloni et al. 2002   |
| w-UPiD | P | 8  | <i>ASAH1</i>   | Spinal muscular atrophy and progressive myoclonic epilepsy                             | MS  | Giráldez et al. 2015    |
| w-UPiD | P | 8  | <i>CYP11B1</i> | Congenital adrenal hyperplasia                                                         | SA  | Matsubara et al. 2014   |
| w-UPiD | P | 8  | <i>LPL</i>     | Lipoprotein lipase deficiency                                                          | MS  | Benlian et al. 1996     |
| w-UPiD | P | 12 | <i>SUOX</i>    | Isolated sulfite oxidase deficiency                                                    | SA  | Cho et al. 2013         |
| w-UPiD | P | 13 | <i>SACS</i>    | Autosomal recessive spastic ataxia of Charlevoix Saguenay                              | MS  | Anesi et al. 2011       |
| w-UPiD | P | 16 | <i>ABCA3</i>   | Lethal surfactant deficiency                                                           | MS  | Hamvas et al. 2009      |
| w-UPiD | P | 16 | <i>FA2H</i>    | Spastic paraplegia type 35                                                             | SA  | Soehn et al. 2016       |
| w-UPiD | P | 16 | <i>FANCA</i>   | Fanconi anemia                                                                         | SA  | Donovan et al. 2016     |
| w-UPiD | P | 17 | <i>ITGB4</i>   | Junctional epidermolysis bullosa with pyloric atresia                                  | MS  | Natsuga et al. 2010     |
| w-UPiD | P | 22 | <i>ARSA</i>    | Metachromatic leukodystrophy                                                           | SA  | Niida et al. 2012       |

Chr., chromosome; M, maternal; M1, meiosis I; M2, meiosis II; MS, Microsatellite analysis; ND, nondisjunction; NGS, next generation sequencing; P, paternal; SA, SNP Array; s-MiRe, segmental UPiD by mitotic recombination; s-UPiD/hD, segmental UPiD with uniparental heterodisomy; UPiD, uniparental isodisomy; w-UPiD, whole chromosomal UPiD.

## References

- Abramowicz MJ, Andrien M, Dupont E, Dorchy H, Parma J, et al: Isodisomy of chromosome 6 in a newborn with methylmalonic acidemia and agenesis of pancreatic beta cells causing diabetes mellitus. *J Clin Invest* 94:418-421 (1994).
- Aminoff A, Gunnar E, Barbaro M, Mannila MN, Duponchel C, et al: Novel mutations in M1crosomal triglyceride transfer protein including maternal uniparental disomy in two patients with abetalipoproteinemia. *Clin Genet* 82:197-200 (2012).
- Anesi L, de Gemmis P, Pandolfo M, Hladnik U: Two novel homozygous SACS mutations in unrelated patients including the first reported case of paternal UPD as an etiologic cause of ARSACS. *J Mol Neurosci* 43:346-349 (2011).
- Aoyama Y, Yamamoto T, Sakaguchi N, Ishige M, Tanaka T, et al: Application of multiplex ligation-dependent probe amplification, and identification of a heterozygous Alu-associated deletion and a uniparental disomy of chromosome 1 in two patients with 3-hydroxy-3-methylglutaryl-CoA lyase deficiency. *Int J Mol Med* 35:1554-1560 (2015).
- Bai S, Lozada A, Jones MC, Dietz HC, Dempsey M, Das S: Mandibuloacral Dysplasia Caused by LMNA Mutations and Uniparental Disomy. *Case Rep Genet* 2014:508231 (2014).
- Bakker B, Bikker H, Hennekam RC, Lommen EJ, Schipper MG, et al: Maternal isodisomy for chromosome 2p causing severe congenital hypothyroidism. *J Clin Endocrinol Metab* 86:1164-1168 (2001).
- Bartoloni L, Blouin JL, Pan Y, Gehrig C, Maiti AK, et al: Mutations in the DNAH11 (axonemal heavy chain dynein type 11) gene cause one form of situs inversus totalis and most likely primary ciliary dyskinesia. *Proc Natl Acad Sci U S A* 99:10282-10286 (2002).
- Baskin B, Geraghty M, Ray PN: Paternal isodisomy of chromosome 2 as a cause of long chain 3-hydroxyacyl-CoA dehydrogenase (LCHAD) deficiency. *Am J Med Genet A* 152A:1808-1811 (2010).
- Benko WS, Hruska KS, Nagan N, Goker-Alpan O, Hart PS, et al: Uniparental disomy of chromosome 1 causing concurrent Charcot-Marie-Tooth and Gaucher disease Type 3. *Neurology* 70:976-978 (2008).
- Benlian P, Foubert L, Gagné E, Bernard L, De Gennes JL, et al: Complete paternal isodisomy for chromosome 8 unmasked by lipoprotein lipase deficiency. *Am J Hum Genet* 59:431-436 (1996).
- Boisseau P, Giraud M, Ternisien C, Veyradier A, Fressinaud E, et al: An unexpected transmission of von Willebrand disease type

- 3: the first case of maternal uniparental disomy 12. *Haematologica* 96:1567-1568 (2011).
- Bruechle NO, Steuernagel P, Zerres K, Kurth I, Eggermann T, Knopp C: Uniparental disomy as an unexpected cause of Meckel-Gruber syndrome: report of a case. *Pediatr Nephrol* (2017).
- Brzustowicz LM, Allitto BA, Matseoane D, Theve R, Michaud L, et al: Paternal isodisomy for chromosome 5 in a child with spinal muscular atrophy. *Am J Hum Genet* 54:482-488 (1994).
- Bulli C, Battistella PA, Bordignon M, Bramanti P, Novelli G, Sangiuolo F: Recessive congenital myotonia resulting from maternal isodisomy of chromosome 7: a case report. *Cases J* 2:7111 (2009).
- Castanet M, Mallya U, Agostini M, Schoenmakers E, Mitchell C, et al: Maternal isodisomy for chromosome 9 causing homozygosity for a novel FOXE1 mutation in syndromic congenital hypothyroidism. *J Clin Endocrinol Metab* 95:4031-4036 (2010).
- Castiglia D, Castori M, Pisaneschi E, Sommi M, Covaciu C, et al: Trisomic rescue causing reduction to homozygosity for a novel ABCA12 mutation in harlequin ichthyosis. *Clin Genet* 76:392-397 (2009).
- Castori M, Floriddia G, Pisaneschi E, Covaciu C, Paradisi M, et al: Complete maternal isodisomy causing reduction to homozygosity for a novel LAMB3 mutation in Herlitz junctional epidermolysis bullosa. *J Dermatol Sci* 51:58-61 (2008).
- Catarzi S, Giunti L, Papadia F, Gabrielli O, Guerrini R, et al: Morquio A syndrome due to maternal uniparental isodisomy of the telomeric end of chromosome 16. *Mol Genet Metab* 105:438-442 (2012).
- Ceballos-Picot I, Guest G, Moriniere V, Mockel L, Daudon M, et al: Maternal uniparental disomy of chromosome 16 in a patient with adenine phosphoribosyltransferase deficiency. *Clin Genet* 80:199-201 (2011).
- Cho SY, Goh DL, Lau KC, Ong HT, Lam CW: MicroSA analysis unmasked paternal uniparental disomy of chromosome 12 in a patient with isolated sulfite oxidase deficiency. *Clin Chim Acta* 426:13-17 (2013).
- Ciullini Mannurita S, Vignoli M, Bianchi L, Kondi A, Gerloni V, et al: CACP syndrome: identification of five novel mutations and of the first case of UPD in the largest European cohort. *Eur J Hum Genet* 22:197-201 (2014).
- Cottrell CE, Mendell J, Hart-Kothari M, Ell D, Thrush DL, et al: Maternal uniparental disomy of chromosome 4 in a patient with limb-girdle muscular dystrophy 2E confirmed by SNP SA technology. *Clin Genet* 81:578-583 (2012).
- Dasi MA, Gonzalez-Conejero R, Izquierdo S, Padilla J, Garcia JL, et al: Uniparental disomy causes deficiencies of vitamin K-dependent proteins. *J Thromb Haemost* 14:2410-2418 (2016).
- Ding Q, Ouyang Q, Xi X, Wang X, Shen Y, Wang H: Maternal chromosome 4 heterodisomy/isodisomy and B $\beta$  chain Trp323X mutation resulting in severe hypodysfibrinogenaemia. *Thromb Haemost* 108:654-661 (2012).
- Donovan FX, Kimble DC, Kim Y, Lach FP, Harper U, et al: Paternal or Maternal Uniparental Disomy of Chromosome 16 Resulting in Homozygosity of a Mutant Allele Causes Fanconi Anemia. *Hum Mutat* 37:465-468 (2016).
- Douglas GV, Wiszniewska J, Lipson MH, Witt DR, McDowell T, et al: Detection of uniparental isodisomy in autosomal recessive mitochondrial DNA depletion syndrome by high-density SNP SA analysis. *J Hum Genet* 56:834-839 (2011).
- Dufourcq-Lagelouse R, Lambert N, Duval M, Viot G, Vilmer E, et al: Chediak-Higashi syndrome associated with maternal uniparental isodisomy of chromosome 1. *Eur J Hum Genet* 7:633-637 (1999).
- Fassihi H, Lu L, Wessagowit V, Ozoemena LC, Jones CA, et al: Complete maternal isodisomy of chromosome 3 in a child with recessive dystrophic epidermolysis bullosa but no other phenotypic abnormalities. *J Invest Dermatol* 126:2039-2043 (2006).
- Fassihi H, Wessagowit V, Ashton GH, Moss C, Ward R, et al: Complete paternal uniparental isodisomy of chromosome 1 resulting in Herlitz junctional epidermolysis bullosa. *Clin Exp Dermatol* 30:71-74 (2005).
- Gelb BD, Willner JP, Dunn TM, Kardon NB, Verloes A, et al: Paternal uniparental disomy for chromosome 1 revealed by molecular analysis of a patient with pycnodysostosis. *Am J Hum Genet* 62:848-854 (1998).
- Giovannoni I, Terracciano A, Gennari F, David E, Francalanci P, Santorelli FM: Paternal isodisomy of chromosome 2 in a child with bile salt export pump deficiency. *Hepatol Res* 42:327-331 (2012).
- Giráldez BG, Guerrero-López R, Ortega-Moreno L, Verdú A, Carrascosa-Romero MC, et al: Uniparental disomy as a cause of spinal muscular atrophy and progressive myoclonic epilepsy: phenotypic homogeneity due to the homozygous c.125C>T mutation in *SAH1*. *Neuromuscul Disord* 25:222-224 (2015).
- Hamvas A, Nogee LM, Wegner DJ, Depass K, Christodoulou J, et al: Inherited surfactant deficiency caused by uniparental disomy of rare mutations in the surfactant protein-B and ATP binding cassette, subfamily a, member 3 genes. *J Pediatr* 155:854-859.e851 (2009).
- Haudry C, de Lonlay P, Malan V, Bole-Feysot C, Assouline Z, et al: Maternal uniparental disomy of chromosome 2 in a patient with a DGUOK mutation associated with hepatocerebral mitochondrial DNA depletion syndrome. *Mol Genet Metab* 107:700-704 (2012).
- Herzfeld T, Wolf N, Winter P, Hackstein H, Vater D, Müller U: Maternal uniparental heterodisomy with partial isodisomy of a

- chromosome 2 carrying a splice acceptor site mutation (IVS9-2A>T) in ALS2 causes infantile-onset ascending spastic paralysis (IAHSP). *Neurogenetics* 10:59-64 (2009).
- Huang YH, Tai CL, Lu YH, Wu TJ, Chen HD, Niu DM: Recessive congenital methemoglobinemia caused by a rare mechanism: maternal uniparental heterodisomy with segmental isodisomy of a chromosome 22. *Blood Cells Mol Dis* 49:114-117 (2012).
- Kantarci S, Ragge NK, Thomas NS, Robinson DO, Noonan KM, et al: Donnai-Barrow syndrome (DBS/FOAR) in a child with a homozygous LRP2 mutation due to complete chromosome 2 paternal isodisomy. *Am J Med Genet A* 146A:1842-1847 (2008).
- Le Caignec C, Isidor B, de Pontbriand U, David V, Audrezet MP, Ferec C, David A: Third case of paternal isodisomy for chromosome 7 with cystic fibrosis: a new patient presenting with normal growth. *Am J Med Genet A* 143A:2696-2699 (2007).
- Lebre AS, Morinière V, Dunand O, Bensman A, Morichon-Delvallez N, Antignac C: Maternal uniparental heterodisomy of chromosome 17 in a patient with nephropathic cystinosis. *Eur J Hum Genet* 17:1019-1023 (2009).
- Li N, Ding YU, Yu T, Li J, Shen Y, et al: Causal variants screened by whole exome sequencing in a patient with maternal uniparental isodisomy of chromosome 10 and a complicated phenotype. *Exp Ther Med* 11:2247-2253 (2016).
- López-Garrido MP, Campos-Mollo E, Harto MA, Escribano J: Primary congenital glaucoma caused by the homozygous F261L CYP11B1 mutation and paternal isodisomy of chromosome 2. *Clin Genet* 76:552-557 (2009).
- Malvagia S, Papi L, Morrone A, Donati MA, Ciani F, et al: Fatal malonyl CoA decarboxylase deficiency due to maternal uniparental isodisomy of the telomeric end of chromosome 16. *Ann Hum Genet* 71:705-712 (2007).
- Matejas V, Muscheites J, Wigger M, Kreutzer HJ, Nizze H, Zenker M: Paternal isodisomy of chromosome 3 unmasked by autosomal recessive microcoria-congenital nephrosis syndrome (Pierson syndrome) in a child with no other phenotypic abnormalities. *Am J Med Genet A* 155A:2601-2604 (2011).
- Matsubara K, Kataoka N, Ogita S, Sano S, Ogata T, et al: Uniparental disomy of chromosome 8 leading to homozygosity of a CYP11B1 mutation in a patient with congenital adrenal hyperplasia: implication for a rare etiology of an autosomal recessive disorder. *Endocr J* 61:629-633 (2014).
- Miura Y, Hiura M, Torigoe K, Numata O, Kuwahara A, et al: Complete paternal uniparental isodisomy for chromosome 1 revealed by mutation analyses of the TRKA (NTRK1) gene encoding a receptor tyrosine kinase for nerve growth factor in a patient with congenital insensitivity to pain with anhidrosis. *Hum Genet* 107:205-209 (2000).
- Natsuga K, Nishie W, Arita K, Shinkuma S, Nakamura H, et al: Complete paternal isodisomy of chromosome 17 in junctional epidermolysis bullosa with pyloric atresia. *J Invest Dermatol* 130:2671-2674 (2010).
- Niida Y, Kuroda M, Mitani Y, Yokoi A, Ozaki M: Paternal uniparental isodisomy of chromosome 22 in a patient with metachromatic leukodystrophy. *J Hum Genet* 57:687-690 (2012).
- Niida Y, Yokoi A, Kuroda M, Mitani Y, Nakagawa H, Ozaki M: A girl with infantile neuronal ceroid lipofuscinosis caused by novel PPT1 mutation and paternal uniparental isodisomy of chromosome 1. *Brain Dev* 38:674-677 (2016).
- Nimmo G, Monsonego S, Descartes M, Franklin J, Steinberg S, Braverman N: Rhizomelic chondrodysplasia punctata type 2 resulting from paternal isodisomy of chromosome 1. *Am J Med Genet A* 152A:1812-1817 (2010).
- Pérez B, Nevado J, Lapunzina P, Gallego L, Pérez-Cerdá C, Merinero B, Ugarte M, Desviat LR: Segmental uniparental disomy leading to homozygosity for a pathogenic mutation in three recessive metabolic diseases. *Mol Genet Metab* 105:270-271 (2012).
- Petit FM, Gajdos V, Parisot F, Capel L, Aboura A, et al: Paternal isodisomy for chromosome 2 as the cause of Crigler-Najjar type I syndrome. *Eur J Hum Genet* 13:278-282 (2005).
- Prando C, Boisson-Dupuis S, Grant AV, Kong XF, Bustamante J, et al: Paternal uniparental isodisomy of chromosome 6 causing a complex syndrome including complete IFN-gamma receptor 1 deficiency. *Am J Med Genet A* 152A:622-629 (2010).
- Pulkkinen L, Bullrich F, Czamecki P, Weiss L, Uitto J: Maternal uniparental disomy of chromosome 1 with reduction to homozygosity of the LAMB3 locus in a patient with Herlitz junctional epidermolysis bullosa. *Am J Hum Genet* 61:611-619 (1997).
- Quan F, Janas J, Toth-Fejel S, Johnson DB, Wolford JK, Popovich BW: Uniparental disomy of the entire X chromosome in a female with Duchenne muscular dystrophy. *Am J Hum Genet* 60:160-165 (1997).
- Riveiro-Alvarez R, Valverde D, Lorda-Sanchez I, Trujillo-Tiebas MJ, Cantalapiedra D, et al: Partial paternal uniparental disomy (UPD) of chromosome 1 in a patient with Stargardt disease. *Mol Vis* 13:96-101 (2007).
- Rivolta C, Berson EL, Dryja TP: Paternal uniparental heterodisomy with partial isodisomy of chromosome 1 in a patient with retinitis pigmentosa without hearing loss and a missense mutation in the Usher syndrome type II gene USH2A. *Arch*

Ophthalmol 120:1566-1571 (2002).

- Roberts JL, Buckley RH, Luo B, Pei J, Lapidus A, et al: CD45-deficient severe combined immunodeficiency caused by uniparental disomy. *Proc Natl Acad Sci U S A* 109:10456-10461 (2012).
- Roosing S, van den Born LI, Hoyng CB, Thiadens AA, de Baere E, et al: Maternal uniparental isodisomy of chromosome 6 reveals a TULP1 mutation as a novel cause of cone dysfunction. *Ophthalmology* 120:1239-1246 (2013).
- Sasaki K, Okamoto N, Kosaki K, Yorifuji T, Shimokawa O, et al: Maternal uniparental isodisomy and heterodisomy on chromosome 6 encompassing a CUL7 gene mutation causing 3M syndrome. *Clin Genet* 80:478-483 (2011).
- Schejbel L, Schmidt IM, Kirchhoff M, Andersen CB, Marquart HV, et al: Complement factor H deficiency and endocapillary glomerulonephritis due to paternal isodisomy and a novel factor H mutation. *Genes Immun* 12:90-99 (2011).
- Shimajima K, Tanaka R, Shimada S, Sangu N, Nakayama J, et al: A novel homozygous mutation of GJC2 derived from maternal uniparental disomy in a female patient with Pelizaeus-Merzbacher-like disease. *J Neurol Sci* 330:123-126 (2013).
- Soehn AS, Rattay TW, Beck-Wödl S, Schäferhoff K, Monk D, Döbler-Neumann M, et al: Uniparental disomy of chromosome 16 unmasks recessive mutations of FA2H/SPG35 in 4 families. *Neurology* 87:186-191 (2016).
- Solomons J, Ridgway O, Hardy C, Kurian MA, Kurian M, et al: Infantile neuroaxonal dystrophy caused by uniparental disomy. *Dev Med Child Neurol* 56:386-389 (2014).
- Spence JE, Perciaccante RG, Greig GM, Willard HF, Ledbetter DH, et al: Uniparental disomy as a mechanism for human genetic disease. *Am J Hum Genet* 42:217-226 (1988).
- Spiro RP, Christian SL, Ledbetter DH, New MI, Wilson RC, et al: Intrauterine growth retardation associated with maternal uniparental disomy for chromosome 6 unmasked by congenital adrenal hyperplasia. *Pediatr Res* 46:510-513 (1999).
- Sulisalo T, Mäkitie O, Sistonen P, Ridanpää M, el-Rifai W, et al: Uniparental disomy in cartilage-hair hypoplasia. *Eur J Hum Genet* 5:35-42 (1997).
- Swensen JJ, Agarwal AM, Esquilin JM, Swierczek S, Perumbeti A, et al: Sick cell disease resulting from uniparental disomy in a child who inherited sickle cell trait. *Blood* 116:2822-2825 (2010).
- Tamura M, Shimajima T, Kawashima M, Yoshida H, Yamamoto K, et al: Detection of Hereditary 1,25-Hydroxyvitamin D-Resistant Rickets Caused by Uniparental Disomy of Chromosome 12 Using Genome-Wide Single Nucleotide Polymorphism SA. *PLoS One* 10:e0131157 (2015).
- Thompson DA, McHenry CL, Li Y, Richards JE, Othman M1, et al: Retinal dystrophy due to paternal isodisomy for chromosome 1 or chromosome 2, with homoallelism for mutations in RPE65 or MERTK, respectively. *Am J Hum Genet* 70:224-229 (2002).
- Travaglini L, Aiello C, Alesi V, Loddo S, Novelli A, et al: Uniparental disomy of chromosome 1 unmasks recessive mutations of PPT1 in a boy with neuronal ceroid lipofuscinosis type 1. *Brain Dev* 39:182-183 (2017).
- Turner CL, Bunyan DJ, Thomas NS, Mackay DJ, Jones HP, et al: Zellweger syndrome resulting from maternal isodisomy of chromosome 1. *Am J Med Genet A* 143A:2172-2177 (2007).
- Watanabe A, Satoh S, Fujita A, Naing BT, Orimo H, Shimada T: Perinatal hypophosphatasia caused by uniparental isodisomy. *Bone* 60:93-97 (2014).
- Woodage T, Prasad M, Dixon JW, Selby RE, Romain DR, et al: Bloom syndrome and maternal uniparental disomy for chromosome 15. *Am J Hum Genet* 55:74-80 (1994).
- Yang XP, Inazu A, Yagi K, Kajinami K, Koizumi J, Mabuchi H: Abetalipoproteinemia caused by maternal isodisomy of chromosome 4q containing an intron 9 splice acceptor mutation in the microsomal triglyceride transfer protein gene. *Arterioscler Thromb Vasc Biol* 19:1950-1955 (1999).
- Zeesman S, McCready E, Sadikovic B, Nowaczyk MJ: Prader-Willi syndrome and Tay-Sachs disease in association with mixed maternal uniparental isodisomy and heterodisomy 15 in a girl who also had isochromosome Xq. *Am J Med Genet A* 167A:180-184 (2015).
- Zeng WQ, Gao H, Brueton L, Hutchin T, Gray G, et al: Fumarase deficiency caused by homozygous P131R mutation and paternal partial isodisomy of chromosome 1. *Am J Med Genet A* 140:1004-1009 (2006).

**Supplemental Table 2.** Distribution of the informative SNP on chromosome 7 of the patient 2

| Cytogenetic bands                                              | Chromosomal Position (hg19) | Informative SNP for heterozygous from both parents; F(AA)/M(BB)/Pt(AB) |              | Informative SNP for maternal UPiD; F(AA)/M(AB)/Pt(BB) |              |
|----------------------------------------------------------------|-----------------------------|------------------------------------------------------------------------|--------------|-------------------------------------------------------|--------------|
| p22.3                                                          | 5,0814 ~ 2,800,000          | 33                                                                     |              | 1                                                     |              |
| p22.2                                                          | 2,800,000 ~ 4,500,000       | 31                                                                     |              | 0                                                     |              |
| p22.1                                                          | 4,500,000 ~ 7,300,000       | 16                                                                     |              | 0                                                     |              |
| p21.3                                                          | 7,300,000 ~ 13,800,000      | 143                                                                    |              | 0                                                     |              |
| p21.2                                                          | 13,800,000 ~ 16,500,000     | 70                                                                     |              | 0                                                     |              |
| p21.1                                                          | 16,500,000 ~ 20,900,000     | 96                                                                     |              | 0                                                     |              |
| p15.3                                                          | 20,900,000 ~ 25,500,000     | 101                                                                    |              | 0                                                     |              |
| p15.2                                                          | 25,500,000 ~ 28,000,000     | 13                                                                     |              | 1                                                     |              |
| p15.1                                                          | 28,000,000 ~ 28,800,000     | 28                                                                     |              | 0                                                     |              |
| p14.3                                                          | 28,800,000 ~ 35,000,000     | 106                                                                    | 1007 (98.2%) | 0                                                     | 3 (0.2%)     |
| p14.2                                                          | 35,000,000 ~ 37,200,000     | 75                                                                     |              | 0                                                     |              |
| p14.1                                                          | 37,200,000 ~ 43,300,000     | 80                                                                     |              | 0                                                     |              |
| p13                                                            | 43,300,000 ~ 45,400,000     | 2                                                                      |              | 0                                                     |              |
| p12.3                                                          | 45,400,000 ~ 49,000,000     | 75                                                                     |              | 1                                                     |              |
| p12.2                                                          | 49,000,000 ~ 50,500,000     | 19                                                                     |              | 0                                                     |              |
| p12.1                                                          | 50,500,000 ~ 54,000,000     | 75                                                                     |              | 0                                                     |              |
| p11.2                                                          | 54,000,000 ~ 58,000,000     | 24                                                                     |              | 0                                                     |              |
| p11.1                                                          | 58,000,000 ~ centromere     | No probe area                                                          |              |                                                       |              |
| q11.1                                                          | centromere ~ 61,700,000     |                                                                        |              |                                                       |              |
| q11.21                                                         | 61,700,000 ~ 67,000,000     | 22                                                                     |              | 0                                                     |              |
| q11.22                                                         | 67,000,000 ~ 72,000,000     | 0                                                                      |              | 134                                                   |              |
| q11.23                                                         | 72,000,000 ~ 77,500,000     | 0                                                                      |              | 22                                                    |              |
| q21.11                                                         | 77,500,000 ~ 86,400,000     | 1                                                                      |              | 268                                                   |              |
| q21.12                                                         | 86,400,000 ~ 88,200,000     | 1                                                                      |              | 37                                                    |              |
| q21.13                                                         | 88,200,000 ~ 91,000,000     | 0                                                                      |              | 34                                                    |              |
| q21.2                                                          | 91,000,000 ~ 97,800,000     | 2                                                                      |              | 141                                                   |              |
| q21.3                                                          | 97,800,000 ~ 98,000,000     | 0                                                                      |              | 1                                                     |              |
| q22.1                                                          | 98,000,000 ~ 103,800,000    | 1                                                                      |              | 59                                                    |              |
| q22.2                                                          | 103,800,000 ~ 104,500,000   | 0                                                                      |              | 17                                                    |              |
| q22.3                                                          | 104,500,000 ~ 107,400,000   | 0                                                                      |              | 60                                                    |              |
| q31.1                                                          | 107,400,000 ~ 114,600,000   | 4                                                                      |              | 124                                                   |              |
| q31.2                                                          | 114,600,000 ~ 117,400,000   | 0                                                                      | 18 (1.8%)    | 34                                                    | 1860 (99.8%) |
| q31.31                                                         | 117,400,000 ~ 121,000,000   | 1                                                                      |              | 27                                                    |              |
| q31.32                                                         | 121,000,000 ~ 123,800,000   | 0                                                                      |              | 13                                                    |              |
| q31.33                                                         | 123,800,000 ~ 127,000,000   | 1                                                                      |              | 87                                                    |              |
| q32.1                                                          | 127,000,000 ~ 129,200,000   | 0                                                                      |              | 10                                                    |              |
| q32.2                                                          | 129,200,000 ~ 130,400,000   | 1                                                                      |              | 19                                                    |              |
| q32.3                                                          | 130,400,000 ~ 132,600,000   | 1                                                                      |              | 111                                                   |              |
| q33                                                            | 132,600,000 ~ 138,200,000   | 3                                                                      |              | 164                                                   |              |
| q34                                                            | 138,200,000 ~ 143,100,000   | 1                                                                      |              | 81                                                    |              |
| q35                                                            | 143,100,000 ~ 147,900,000   | 1                                                                      |              | 93                                                    |              |
| q36.1                                                          | 147,900,000 ~ 152,600,000   | 0                                                                      |              | 118                                                   |              |
| q36.2                                                          | 152,600,000 ~ 155,000,000   | 0                                                                      |              | 94                                                    |              |
| q36.3                                                          | 155,000,000 ~ 159,130,000   | 0                                                                      |              | 92                                                    |              |
| Total SNP number                                               |                             | 1025                                                                   |              | 1863                                                  |              |
| F, father; M, mother; Pt, patient; UPiD, uniparental isodisomy |                             |                                                                        |              |                                                       |              |

NOTE: The informative SNP patterns clearly changes between q11.21 and q11.22 as shown in Fig. 2B. It was impossible to determine whether the UPiD within a distal region of short arm in the figure is real or not from the informative SNP patterns.

**Supplemental Table 3.** Distribution of the informative SNP on chromosome 15 of the patient 3

| Cytogenetic bands | Chromosomal Position (hg19) | Informative SNP for maternal UPiD; F(AA)/M(AB)/Pt(BB) | Maternal UPiD SNP density (SNP/Mb) | Informative SNP for maternal UPiD or UPhD; F(AA)/M(BB)/Pt(BB) | Maternal UPiD or UPhD SNP density (SNP/Mb) | distance (Mb) |
|-------------------|-----------------------------|-------------------------------------------------------|------------------------------------|---------------------------------------------------------------|--------------------------------------------|---------------|
| q11               | 20,700,000 ~ 25,700,000     | 4                                                     | 0.8                                | 18                                                            | 3.6                                        | 5.0           |
| q12               | 25,700,000 ~ 28,000,000     | 5                                                     | 2.2                                | 31                                                            | 13.5                                       | 2.3           |
| q13.2             | 28,000,000 ~ 31,200,000     | 5                                                     | 1.6                                | 10                                                            | 3.1                                        | 3.2           |
| q13.3             | 31,200,000 ~ 33,600,000     | 14                                                    | 5.8                                | 9                                                             | 3.8                                        | 2.4           |
| q14               | 33,600,000 ~ 40,000,000     | 185                                                   | <b>28.9</b>                        | 67                                                            | 10.5                                       | 6.4           |
| q15               | 40,000,000 ~ 44,800,000     | 11                                                    | 2.3                                | 3                                                             | 0.6                                        | 4.8           |
| q21.1             | 44,800,000 ~ 49,500,000     | 10                                                    | 2.1                                | 39                                                            | 8.3                                        | 4.7           |
| q21.2             | 49,500,000 ~ 52,900,000     | 5                                                     | 1.5                                | 38                                                            | 11.2                                       | 3.4           |
| q21.3             | 52,900,000 ~ 59,000,000     | 12                                                    | 2.0                                | 1                                                             | 0.2                                        | 6.1           |
| q22.2             | 59,000,000 ~ 63,700,000     | 10                                                    | 2.1                                | 45                                                            | 9.6                                        | 4.7           |
| q22.3             | 63,700,000 ~ 67,500,000     | 2                                                     | 0.5                                | 31                                                            | 8.2                                        | 3.8           |
| q23               | 67,500,000 ~ 72,700,000     | 3                                                     | 0.6                                | 14                                                            | 2.7                                        | 5.2           |
| q24.1             | 72,700,000 ~ 75,200,000     | 1                                                     | 0.4                                | 8                                                             | 3.2                                        | 2.5           |
| q24.3             | 75,200,000 ~ 78,300,000     | 3                                                     | 1.8                                | 16                                                            | 5.2                                        | 3.1           |
| q25.1             | 78,300,000 ~ 81,700,000     | 7                                                     | 2.1                                | 22                                                            | 6.5                                        | 3.4           |
| q25.2             | 81,700,000 ~ 85,200,000     | 2                                                     | 0.6                                | 10                                                            | 2.9                                        | 3.5           |
| q25.3             | 85,200,000 ~ 89,000,000     | 122                                                   | <b>32.1</b>                        | 42                                                            | 11.1                                       | 3.8           |
| q26.1             | 89,000,000 ~ 94,300,000     | 229                                                   | <b>43.2</b>                        | 75                                                            | 14.2                                       | 5.3           |
| q26.2             | 94,300,000 ~ 98,500,000     | 164                                                   | <b>39.0</b>                        | 68                                                            | 16.2                                       | 4.2           |
| q26.3             | 98,500,000 ~ 102,500,000    | 88                                                    | <b>22.0</b>                        | 52                                                            | 13.0                                       | 4.0           |
| Total SNP number  |                             | 882                                                   |                                    | 1556                                                          |                                            |               |

F, father; M, mother; Pt, patient; UPhD, uniparental heterodisomy; UPiD, uniparental isodisomy

NOTE: Consistent with the Fig. 2C, the density of UPiD is high at q14 and q25.3 to qter. It was impossible to determine whether the UPiD at q22 and q24.1 in the figure is real or not from the informative SNP patterns.
